# Supplementary material for: Serum Markers in Rheumatoid Arthritis: A Longitudinal Study of Patients Undergoing Infliximab Treatment
Source: Hindawi journal article supplement (doi:10.1155/2015/276815), 2015-01-01
Supplement: f1 [file 276815.f1.pdf]

## Supplementary Tables 1-2

**Supplementary Table 1.** Distribution of ESR (A and B) and CRP (C and D) by gender and age.

**A) Distribution of ESR in mm per hour in the male population of the cohort.**

| Men<br>n = 15          | Assessment time points |      |      |       |
|------------------------|------------------------|------|------|-------|
|                        | 0                      | 3    | 6    | 12    |
| Mean                   | 29.0                   | 15.7 | 26.0 | 29.1  |
| SD†                    | 21.2                   | 14.2 | 15.9 | 17.1  |
| Min-max                | 2-81                   | 2-60 | 8-59 | 10-59 |
| Positive<br>< 50 years | 2                      | 0    | 4    | 4     |
| Positive<br>> 50 years | 8                      | 4    | 6    | 7     |

**B) Distribution of ESR in mm per hour in the female population of the cohort.**

| Women<br>n = 24        | Assessment time points |      |      |      |
|------------------------|------------------------|------|------|------|
|                        | 0                      | 3    | 6    | 12   |
| Mean (mg/L)            | 40.1                   | 21.2 | 22.5 | 29.8 |
| SD                     | 24.0                   | 18.4 | 17.4 | 25.7 |
| Min-max                | 8-105                  | 5-80 | 5-86 | 7-90 |
| Positive<br>< 50 years | 4                      | 2    | 0    | 1    |
| Positive<br>> 50 years | 12                     | 3    | 4    | 6    |

**C) Distribution of CRP in mg per litre in the male population of the cohort.**

| Men<br>n = 15        | Assessment time points |      |      |      |
|----------------------|------------------------|------|------|------|
|                      | 0                      | 3    | 6    | 12   |
| Mean                 | 25.1                   | 7.8  | 12.3 | 15.8 |
| SD                   | 13.9                   | 14.0 | 10.4 | 14.8 |
| Min-max              | 0-51                   | 0-42 | 0-28 | 0-46 |
| Positive<br>> 5 mg/L | 14                     | 5    | 11   | 10   |

**D) Distribution of CRP in mg per litre in the female population of the cohort.**

| Women<br>n = 24      | Assessment time points |      |      |       |
|----------------------|------------------------|------|------|-------|
|                      | 0                      | 3    | 6    | 12    |
| Mean                 | 41.0                   | 10.3 | 7.9  | 18.4  |
| SD                   | 30.2                   | 15.8 | 17.2 | 36.2  |
| Min-max              | 7-135                  | 0-60 | 0-80 | 0-164 |
| Positive<br>> 5 mg/L | 24                     | 10   | 9    | 13    |

† SD = Standard deviation

**Supplementary Table 2.** Rheumatoid factor and anti-CCP positive RA and SS patients.

**A)** Sero-positive RA and SS patients at baseline, 3, 6 and 12 months after initiation of treatment.

| <b>Assessment time points</b> | <b>RA patients</b><br>(n=39) |          |          |           | <b>SS patients</b><br>(n=134) |
|-------------------------------|------------------------------|----------|----------|-----------|-------------------------------|
|                               | <b>0</b>                     | <b>3</b> | <b>6</b> | <b>12</b> | <b>N/A<sup>‡</sup></b>        |
| RF Positive (n/%)             | 6/15                         | 7/18     | 7/18     | 7/18      | 52/39                         |
| Anti-CCP2 Positive (n/%)      | 31/80                        | 30/77    | 30/77    | 28/72     | N/A                           |
| Double positive (n/%)         | 4/10                         | 4/10     | 4/10     | 5/13      | N/A                           |

**B)** Number of sero-positive patients compared with initial analysis in the clinic at baseline.

|                          | <b>Thesis</b><br>(n=39) | <b>Clinic</b><br>(n=39) |
|--------------------------|-------------------------|-------------------------|
| RF-positive (n/%)        | 6/15                    | 28/72                   |
| Anti-CCP2 positive (n/%) | 31/80                   | 31/80                   |
| Double positive (n/%)    | 4/10                    | 27/69                   |

## Supplementary Figures 1 - 5

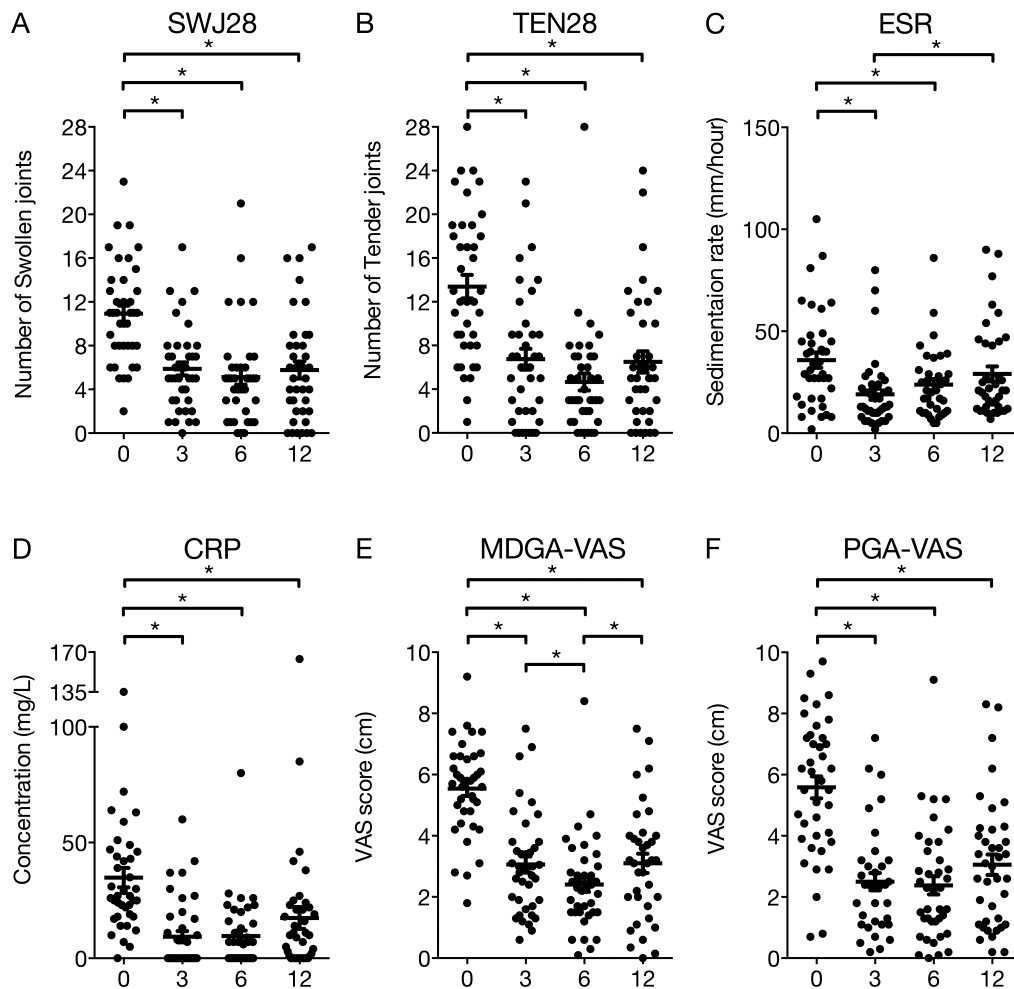

**Supplementary Figure 1.** Various clinical assessments show a significant decrease in disease activity. Scatter dot plots where each dot represents one individual patient. The x-axes illustrate the four assessment time points indicated as 0, 3, 6 and 12 months after treatment is initiated. The horizontal lines in the dot plot illustrate the mean, and the vertical error lines are  $\pm$  standard error mean (SEM) in a paired t-test. **A)** Number of swollen joints. **B)** Number of tender joints. **C)** Erythrocyte sedimentation rate, horizontal dotted line illustrates the highest reference value. **D)** C-reactive protein concentration, horizontal dotted line illustrates the reference concentration. **E)** Visual Analogue Scale scores for individual patients, assessed by rheumatologists. **F)** Visual Analogue Scale scores, subjectively assessed by the individual patient.

A Disease activity distribution (DAS28)

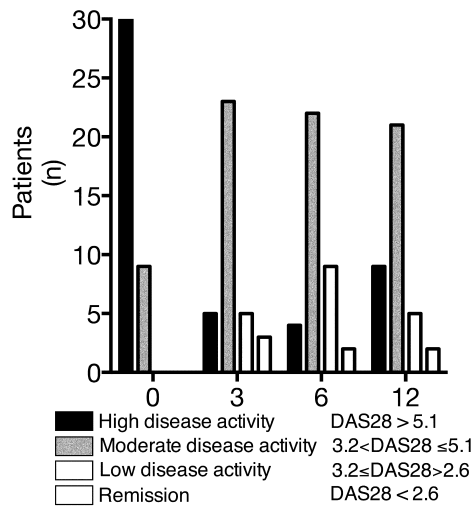

B Disease activity distribution (SDAI)

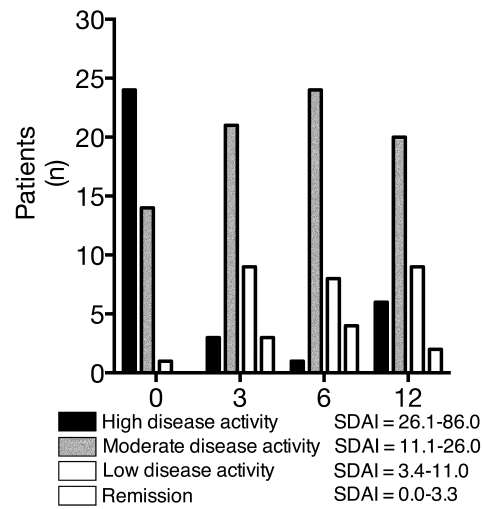

**Supplementary Figure 2.** Distribution of in RA patients into grouped disease activity using the DAS28 and SDAI scores. A) Disease activity distribution for SDAI during the study period; B) Disease activity distribution for DAS28 during the study period. The y-axes represent the number of patients of either disease activity; i) high; ii) moderate; iii) low; and iv) patients who are considered in remission. The x-axes illustrate the four assessment time points indicated as 0, 3, 6 and 12 months after treatment is initiated.

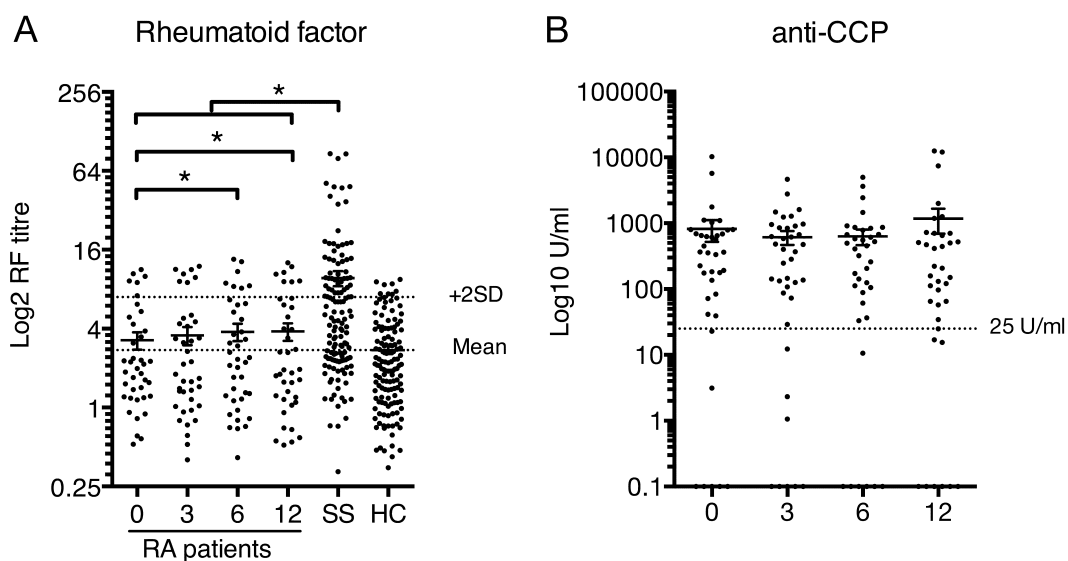

**Supplementary Figure 3.** IgG RF and anti-CCP in rheumatoid arthritis patients. Figures A and B are scatter dot plots, where each dot represents one individual patient. The x-axes illustrate the four assessment months after infliximab treatment is initiated. A) Showing the IgG-RF titers in RA patients, Sjögrens' Syndrome patients (SS) and blood donors/healthy controls (HC). The mean and the mean+2SD values of the healthy controls are indicated by a dotted lines, indicating sero-positive (above) and negative (below) titers. B) The levels of anti-CCP in the RA patients over the study period given as units per milliliter (U/ml) on a log<sub>10</sub> scale. The cut-off value of 25U/ml is indicated by a dotted line.
